# Supplementary material
Source: HighWire-hosted journal article supplement (http://dmd.aspetjournals.org/highwire/filestream/66541/field_highwire_adjunct_files/0/Supplemental_Material_DMD_63271.pdf)
Supplement: Supplemental_Material_DMD_63271.pdf [file Supplemental_Material_DMD_63271.pdf]

## Drug Metabolism and Disposition #063271 – Supplemental Data

Glucuronidation of OTS167 in humans is catalyzed by UDP-glucuronosyltransferases

UGT1A1, UGT1A3, UGT1A8 and UGT1A10

Jacqueline Ramírez, Snezana Mirkov, Larry K. House, Mark J. Ratain

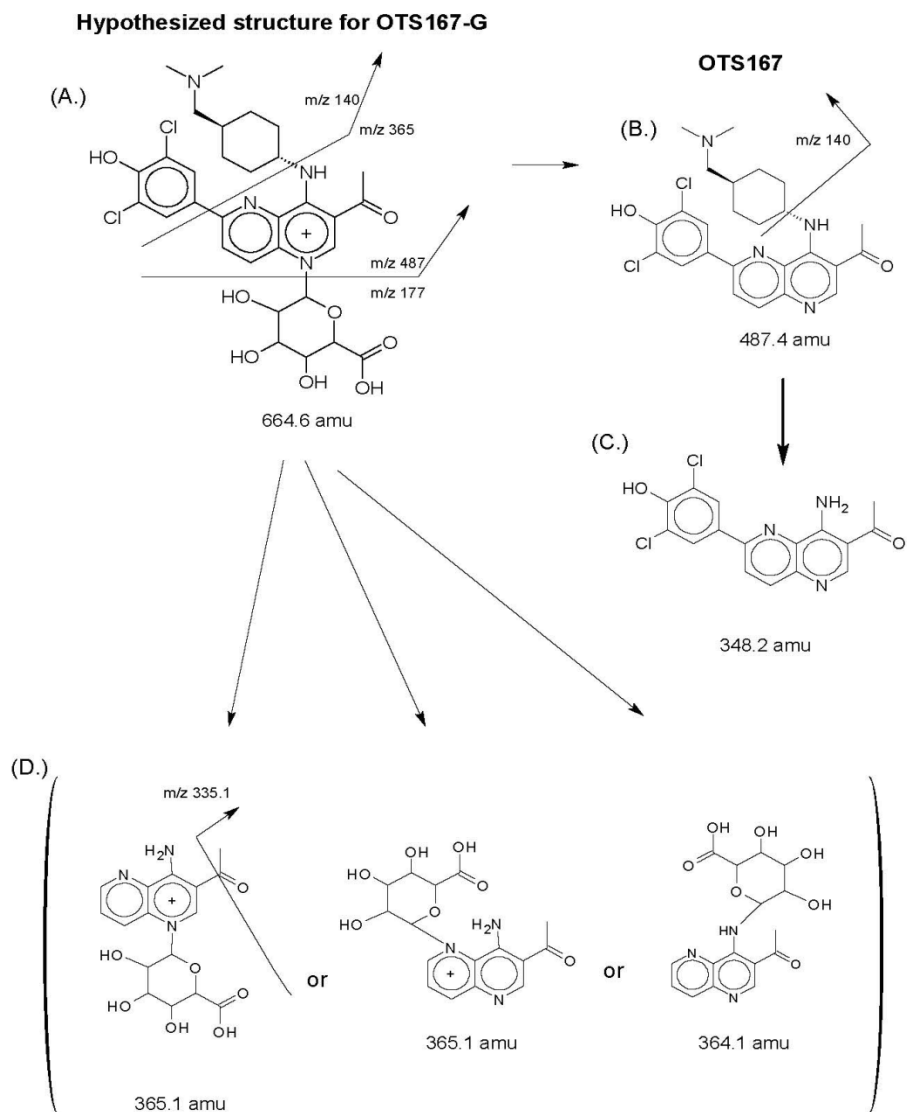

**Supplemental Figure 1. Hypothesized structure of OTS167-G (A), structure of OTS167**

**(B), and fragment molecules (C) and (D).**

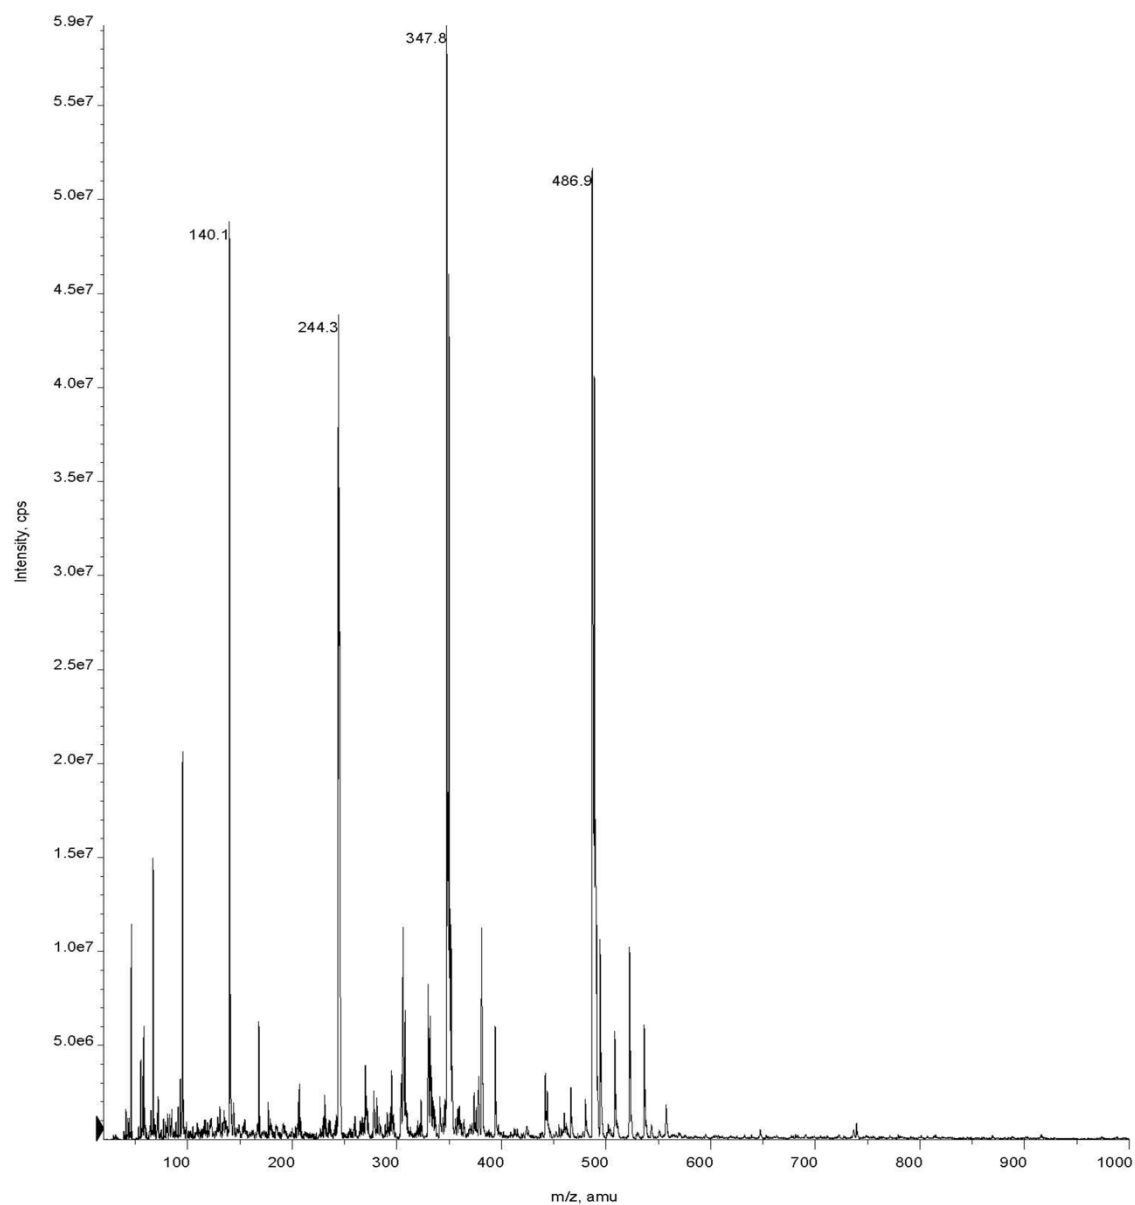

**Supplemental Figure 2. Multi-channel averaged Q1 mass spectrometry scan for OTS167.**

The most intense signals occurred at m/z's of: 486.9 [M<sup>+</sup>], 347.8 fragment, 244.3 [M+2H]<sup>2+</sup>, and 140.1 fragment. The parent compound (486.9 m/z) and the 347.8 m/z fragment refer to structures in Supplemental Figure 1.

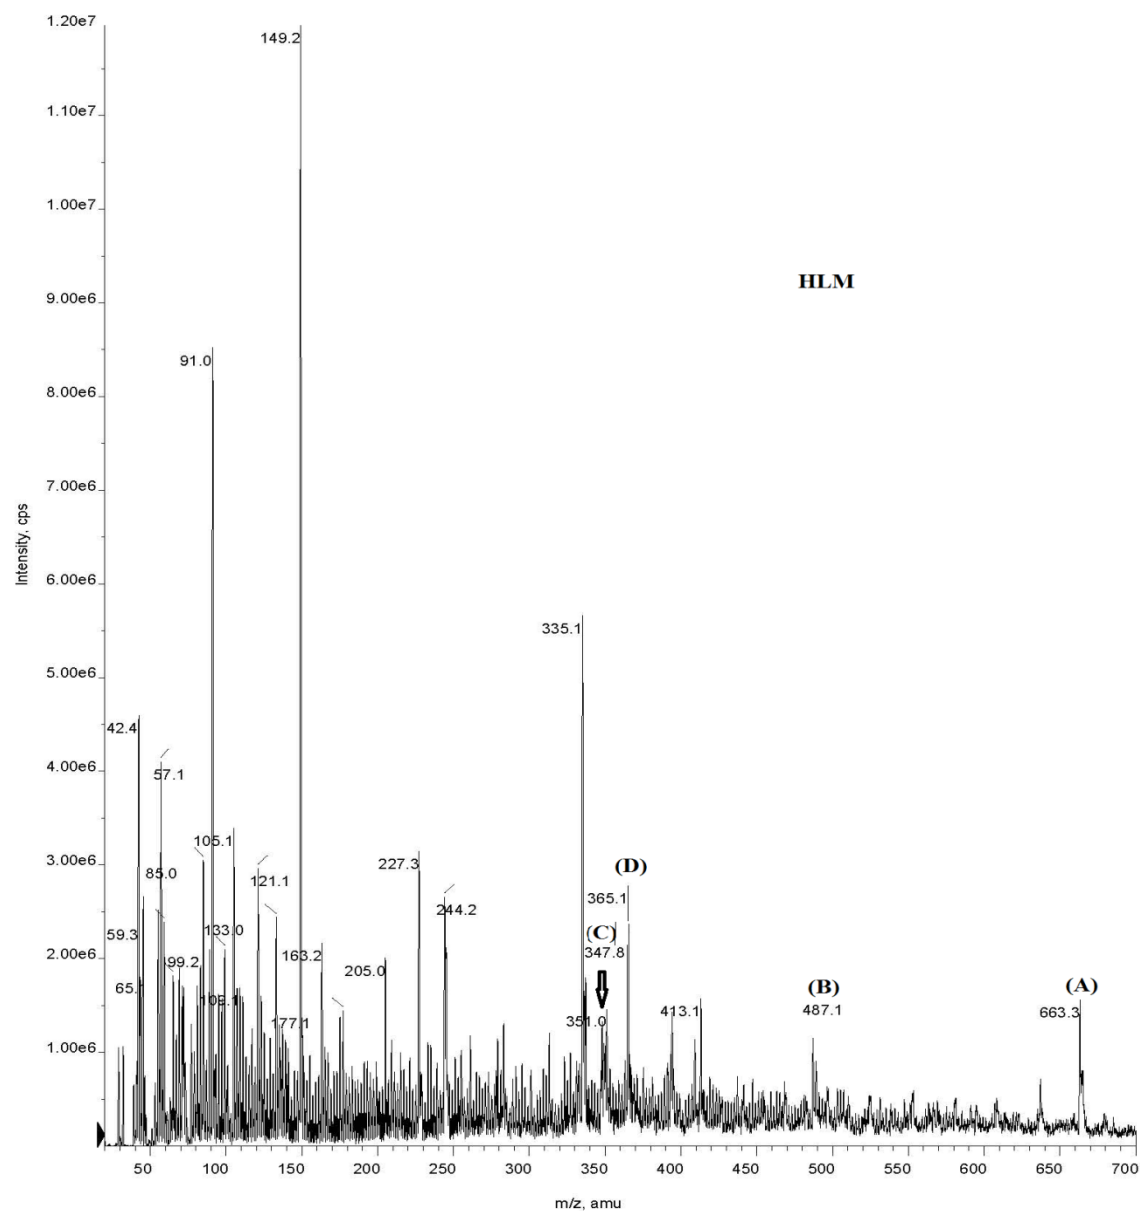

**Supplemental Figure 3. Multi-channel averaged Q1 mass spectrometry scan for collected glucuronide peak formed during incubation with HLM. (A), (B), (C) and (D) refer to structures in Supplemental Figure 1.**

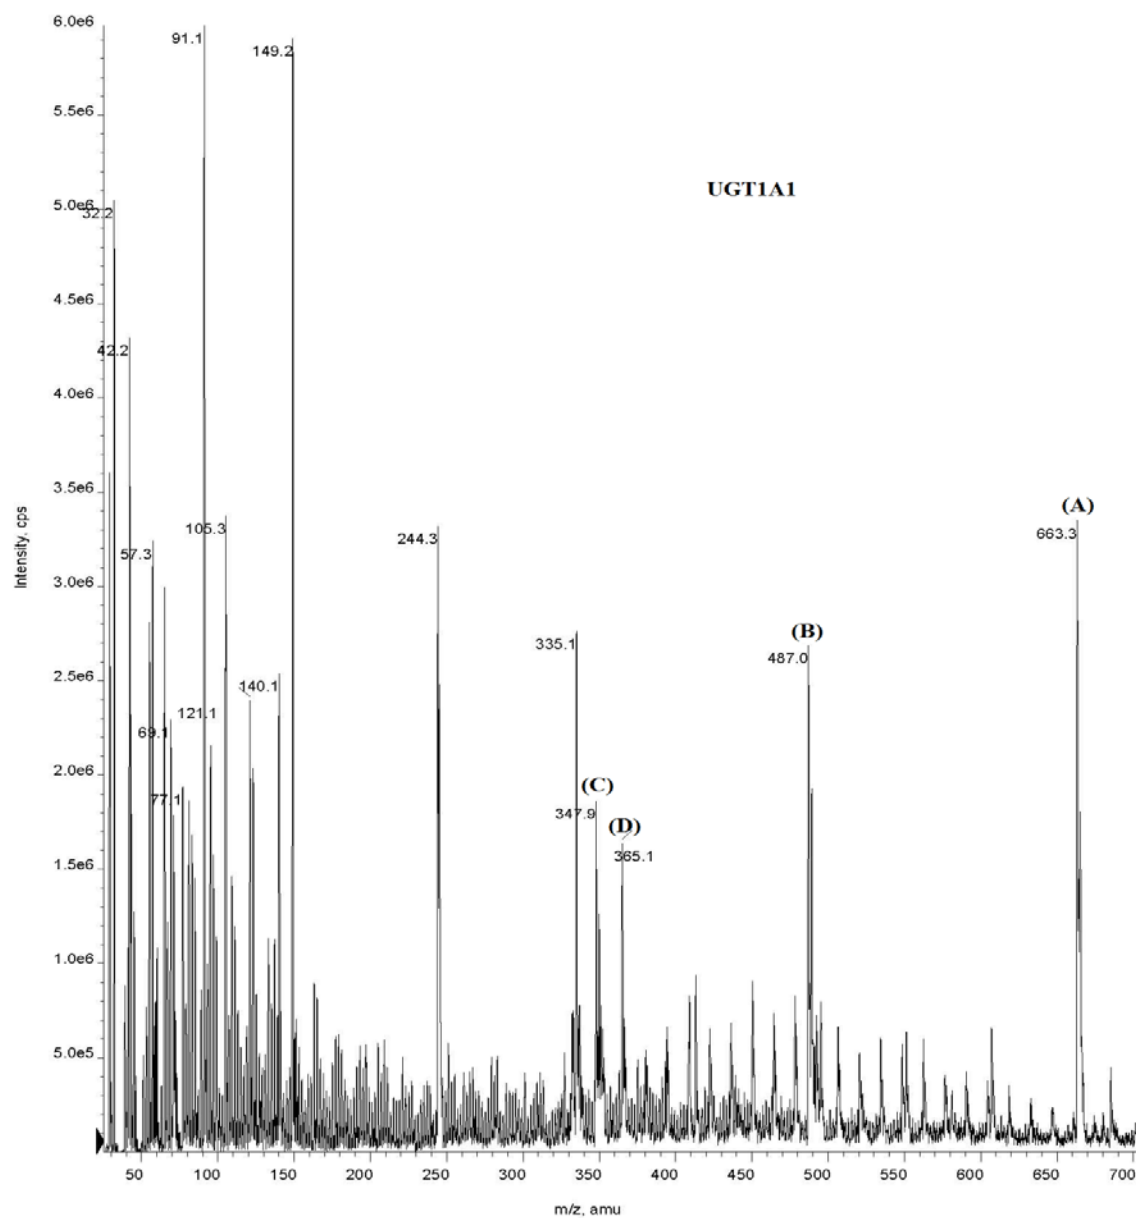

**Supplemental Figure 4. Multi-channel averaged Q1 mass spectrometry scan for collected glucuronide peak formed during incubation with UGT1A1. (A), (B), (C) and (D) refer to structures in Supplemental Figure 1.**

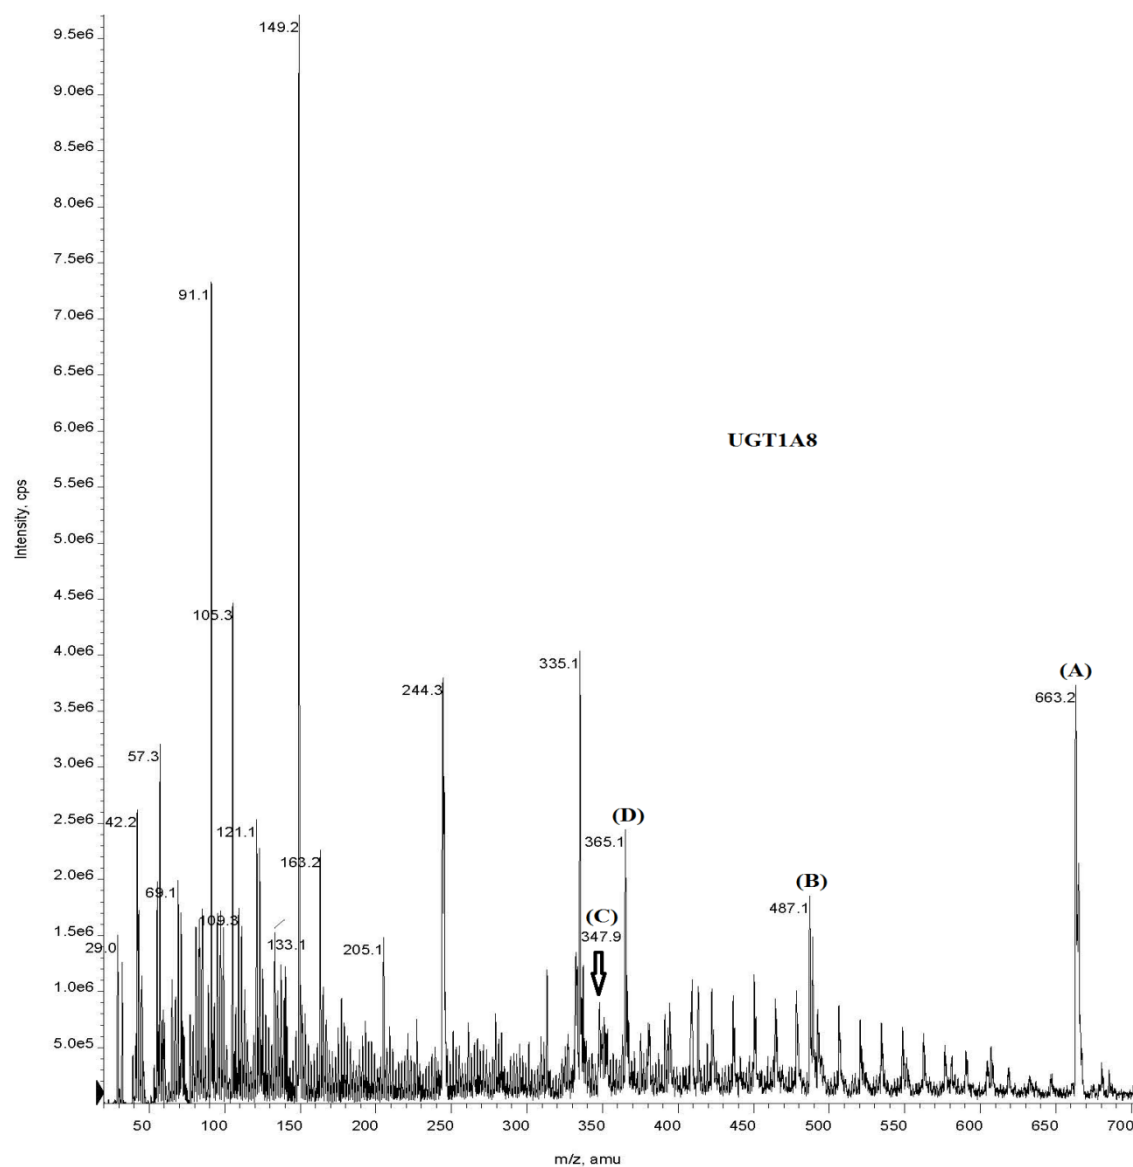

**Supplemental Figure 5. Multi-channel averaged Q1 mass spectrometry scan for collected glucuronide peak formed during incubation with UGT1A8. (A), (B), (C) and (D) refer to structures in Supplemental Figure 1.**
